# Supplementary material for: Risk factor analysis and predictive model development for air leakage after thoracoscopic pulmonary wedge resection
Source: PubMed Central journal article supplement — J Thorac Dis. 2024 Sep 9;16(10):6806–19. doi: 10.21037/jtd-24-1090 (PMC11565331; doi:10.21037/jtd-24-1090), 2024-09-09
Supplement: jtd-16-10-6806-dss.pdf [file jtd-16-10-6806-dss.pdf]

## Data Sharing Statement

|                     |                                                                                                                                                     |                                                                                                                  |
|---------------------|-----------------------------------------------------------------------------------------------------------------------------------------------------|------------------------------------------------------------------------------------------------------------------|
| <b>Article Info</b> | https://dx.doi.org/10.21037/jtd-24-1090                                                                                                             |                                                                                                                  |
| <b>Item</b>         | <b>Question</b>                                                                                                                                     | <b>Authors' Response<br/>(place "-" if not applicable)</b>                                                       |
| 1                   | Would you like to share data collected for your study to others?                                                                                    | Yes.                                                                                                             |
| 2                   | If not, would you like to share the reason for your decision?                                                                                       | -                                                                                                                |
| 3                   | What data in particular will be shared?                                                                                                             | The demographic and clinical data will be shared.                                                                |
| 4                   | Any other documents will be shared? Such as study protocol, statistical analysis plan, informed consent form, clinical study report, analytic code. | Statistical analysis plan will also be shared if requested.                                                      |
| 5                   | When will data availability begin?                                                                                                                  | From the publication date.                                                                                       |
| 6                   | When will data availability end?                                                                                                                    | Two years within the publication date, since the technique or data may be updated over time.                     |
| 7                   | To whom will you share the data?                                                                                                                    | Medical oncologists and thoracic surgeons who are interested in this study.                                      |
| 8                   | For what type of analysis or purpose?                                                                                                               | For analysis to predict the risk of air leaks in patients undergoing thoracoscopic pulmonary wedge resection.    |
| 9                   | How or where can the data/documents be obtained?                                                                                                    | Emails could be sent to the address below to obtain the shared data:<br>chenchun0209@fjmu.edu.cn                 |
| 10                  | Any other restrictions?                                                                                                                             | We may balance the potential benefits and risks for each request and then provide the data that could be shared. |
